# Supplementary material
Source: Royal Society of Chemistry journal article supplement (doi:10.1039/d6ta00649c)
Supplement: d6ta00649c1.pdf [file d6ta00649c1.pdf]

## Supplementary Information

### Engineering Buried Interface by A Conductive Polymer to Mediate Carrier Behavior for Efficient Solar-driven Water Splitting on Si-based Photocathode

*Ying Qiang,<sup>1,2</sup> Xiying Fu,<sup>3</sup> Yongjian Jia<sup>1,2</sup>*

1. National Engineering Research Center for Technology and Equipment of Environmental

Deposition, Lanzhou Jiaotong University, Lanzhou 730070, China;

2. Key Lab of Opt-Electronic Technology and Intelligent Control of Ministry of Education,

Lanzhou Jiaotong University, Lanzhou 730070, China;

3. College of Material Science and Engineering, Hebei University of Engineering, Handan

056038, China

Corresponding author's email: [Jiayj88@hotmail.com](mailto:Jiayj88@hotmail.com)

## Supplementary Note S1:

### Chemicals and materials

Single-crystalline *p*-Si (100) wafers (one-side polished) with a starting thickness of  $625\pm 25$   $\mu\text{m}$ , diameter of 6 inches and resistivity of 0.1-1  $\Omega$  cm were obtained from Kaihua Crystal Chip Electronics Co., Ltd. Potassium hydroxide purchased (KOH,  $\geq 98\%$ ), hydrogen peroxide ( $\text{H}_2\text{O}_2$ , 30%), ammonia ( $\text{NH}_4\text{OH}$ ,) and sodium chloride (NaCl, 99.5%) were purchased from China National Pharmaceutical Group Chemical Reagent Co., Ltd. Potassium hexacyanoferrate(III) ( $\text{K}_3[\text{Fe}(\text{CN})_6]$ ,  $\geq 99\%$ ) and Tetra-*n*-Butylammonium hexafluorophosphate ( $n\text{-Bu}_4\text{NPF}_6$ , 99%) was purchased from Anhui Zesheng Technology Co., Ltd. Silver nitrate ( $\text{AgNO}_3$ , 99.8 %) and hydrochloric acid (HCl) were provided by Nanjing Chemical Reagent Co., Ltd. Triethanolamine ( $\text{C}_6\text{H}_{15}\text{NO}_3$ , 99%) was supplied by Shanghai Sa'en Chemical Technology Co., Ltd. Cadmium acetate dihydrate ( $\text{C}_4\text{H}_6\text{CdO}_4$ , 99.5%) was supplied by Shanghai Zhongqin Chemical Reagent Co., Ltd.

Sodium thiosulfate pentahydrate ( $\text{Na}_4\text{S}_2\text{O}_3 \cdot 5\text{H}_2\text{O}$ , 99.5%) was purchased from Yantai Shuangshuang Chemical Co., Ltd. Cobalt (II) chloride hexahydrate ( $\text{CoCl}_2 \cdot 6\text{H}_2\text{O}$ , 99%) and Boric acid ( $\text{H}_3\text{BO}_3$ , 99%) were provided by Sichuan Xilong Scientific Co., Ltd. Sodium dihydrogen phosphate anhydrous ( $\text{NaH}_2\text{PO}_4$ , 99%) was supplied by Anhui Senrise Technology Co., Ltd. Dichloromethane ( $\text{CH}_2\text{Cl}_2$ , 99%), 3-Chlorothiophene ( $\text{C}_4\text{H}_3\text{ClS}$ , 98%) and Pyrrole ( $\text{C}_4\text{H}_5\text{N}$ , 99%) were obtained from Lianlong Bohua (Tianjin) Pharmaceutical Chemistry Co., Ltd. Aniline ( $\text{C}_6\text{H}_7\text{N}$ , 99.5%) was purchased from Shanghai Maclean's Biochemical Technology Co., Ltd. 2,3-Dihydrothieno[3,4-*b*]-

1,4-dioxin ( $C_6H_6O_2S$ , 99%) and Thiophene ( $C_4H_4S$ , 99%) were provided by Shanghai Titan Scientific Chemistry Co., Lt. Acetonitrile ( $CH_3CN$ ,  $\geq 99\%$ ) was produced by Chengdu Kelong Chemical Co., Ltd.  $N_2$  gas (99.999%) was obtained from Lanzhou Yulong Gas Co., Ltd.

All chemicals were used as received without further purification.

## Characterizations

The obtained samples were characterized by X-ray powder diffraction (XRD) on a Bruker D8 ADVANCE X-ray diffractometer using Cu  $K\alpha$  radiation (operating voltage: 40 kV, operating current: 200 mA, scan rate:  $5^\circ \text{ min}^{-1}$ ). The morphologies of the electrodes were performed by a Quanta 200 FEG scanning electron microscope (SEM) equipped with an energy dispersive spectrometer (accelerating voltage of 20 kV). X-ray photoelectron spectroscopy (XPS) measurements were performed by Thermo SCIENTIFIC Nexsa with monochromatized Al  $K\alpha$  excitation ( $h\nu=1486.6\text{eV}$ ). The binding energy was calibrated using the C 1s photoelectron peak at 284.8 eV as the reference. The thickness of the materials was measured by probe profilometer (Dektak XTL, Bruker). The steady-state photoluminescence (PL) measurements were carried out on a photoluminescence spectrometer using a xenon arc lamp (F-7100, Hitachi, Japan, excitation of 400 nm)

## Supplementary Note S2:

### Fabrication of Photocathode

#### 1. Wet chemical etching of Si pyramid

Solar-grade *p*-type crystalline Si (100) wafers were cut into pieces and cleaned with a standard RCA process to remove all contaminants on the pristine Si substrate. In a typical process, at the very first step, this silicon substrate is cleaned by RCA1 solution ( $\text{NH}_4\text{H}_2\text{O}:\text{H}_2\text{O}_2:\text{H}_2\text{O}=1:1:5$ ) then in RCA2 solution ( $\text{HCl}:\text{H}_2\text{O}_2:\text{H}_2\text{O}=1:1:6$ ) for 10 minutes at 70°C in each case. After that, the clean Si wafers were soaked in a 50 mL etchant solution containing 2 wt% KOH and 2.5 mL isopropanol at 80 °C for 30 min for SiP formation.

#### 2. Assembly of Si-based photocathodes

A Ga/In eutectic alloy was coated on the back of a Si wafer and attached to a copper bar. Conductive silver paint was then applied to affix the copper bar. After drying edges, some parts of the front surface and the whole back surface of the Si wafer were sealed with non-conductive epoxy to expose an active area of  $\sim 0.36 \text{ cm}^2$ .

#### 3. The Polymer loading on *p*-Si wafers

**Si/PTH:** 1.5 mM thiophene was added in a mixed solvent of  $\text{CH}_3\text{CN}$  and  $\text{CH}_2\text{Cl}_2$  (volume ratio 3:1) consisted with 0.1 M  $\text{n-Bu}_4\text{NPF}_6$  as the electrolyte. A Pt counter electrode and an  $\text{Ag}/\text{Ag}^+$  reference electrode were employed. Electrodeposition was conducted at a potential of 2.5 V vs.  $\text{Ag}/\text{Ag}^+$  for a certain time. After that, the obtained SiP electrode was then dried with a nitrogen gun.

**Si/PPy:** The work electrode was immersed in an acetonitrile/ dichloromethane (3:1)

solution

containing pyrrole (3 mM). The electropolymerization was conducted in a three-electrode system at room temperature for 60 min at a constantly applied voltage of 0.95 V vs Ag/AgCl. Subsequently, the PPy film was rinsed by acetonitrile and ethanol several times and then dried under argon.

**Si/PEDOT:** 0.01 M 3,4-Ethylenedioxythiophene was added in CH<sub>3</sub>CN consisted with 0.01 M LiClO<sub>4</sub>. A Pt counter electrode and an Ag/Ag<sup>+</sup> reference electrode were employed. Electrodeposition was conducted at a potential of 1.2 V vs. Ag/Ag<sup>+</sup> for a certain time. After that, the obtained Si electrode was then dried with a nitrogen gun.

**Si/3-Cl PTH:** 0.02 mM 3-Chlorothiophene was added in CH<sub>3</sub>CN consisted with 0.1 M n-Bu<sub>4</sub>NPF<sub>6</sub> as the electrolyte. A Pt counter electrode and an Ag/Ag<sup>+</sup> reference electrode were employed. Electrodeposition was conducted at a potential of 1.8 V vs. Ag/Ag<sup>+</sup> for a certain time. After that, the obtained Si electrode was then dried with a nitrogen gun.

**Si/PANI:** Within a CV method, a PANI thin film was deposited on cleaned SiP wafers ranged from -1.2 V to 0.2 V vs. Ag/AgCl for a certain time, using a precursor solution of 0.5 M aniline and 0.5 M H<sub>2</sub>SO<sub>4</sub>. Subsequently, each PANI-covered SiP wafer was then dried with a nitrogen gun.

#### **4. Deposition of CdS films**

The solution of 0.2 M (CH<sub>3</sub>COO)<sub>2</sub>Cd·2H<sub>2</sub>O and 0.2 M Na<sub>4</sub>S<sub>2</sub>O<sub>3</sub>·5H<sub>2</sub>O was adjusted pH to approximately 2.7 to use as the electrolyte. The electrodeposition process was carried out at a three-electrode configuration with the Si electrode as the working

electrode (WE), saturated Ag/AgCl electrode (3 M KCl) as the reference electrode (RE), and carbon rod as the counter electrode (CE). A constant current electrodeposition was carried out at 1.4 V under 75 °C for a certain time. Then, the obtained electrode was taken out and washed by deionized water and ethanol successively.

## **5. Light-assisted electrodeposition of Co-P**

The Co-P was deposited using an electrodeposition process. boric acid ( $\text{H}_3\text{BO}_3$ , 0.15 M), sodium chloride (NaCl, 0.1 M), Cobalt(II) chloride hexahydrate ( $\text{CoCl}_2 \cdot 6\text{H}_2\text{O}$ , 0.2 M), and sodium phosphite ( $\text{NaH}_2\text{PO}_3$ , 0.06 M) were added in 50 mL water as the electrolyte. A Pt counter electrode and an Ag/AgCl reference electrode were employed. Electrodeposition was carried out at a potential of -0.75 V vs. Ag/AgCl for a certain time. Before starting the deposition, the light source was turned on. After the deposition current stabilized, the light source was shielded to carry out the electrodeposition.

## **6. Fabrication of Photoanode**

### **Fabrication of $\text{TiO}_2$ nanotube arrays**

$\text{TiO}_2$  nanotube arrays were prepared using a two-step anodization process in an electrolyte consisting of ethylene glycol with 0.3 wt.%  $\text{NH}_4\text{F}$  and 2 wt.%  $\text{H}_2\text{O}$ . Titanium foils (99.4% purity, 0.1 mm thickness) were used. The process began with ultrasonic cleaning of the titanium foils in chloroform, acetone, and ethanol for 10 minutes each, followed by drying. The first anodization was carried out at 60 V for 1 hour, using the titanium foil as the anode and a graphite plate as the cathode. After a uniform oxide

layer formed, the samples were cleaned in a 1:1 ethanol-deionized water solution to remove the oxide. The second anodization, also at 60 V but for 2 hours, was conducted while maintaining the electrolyte at 5 °C to ensure uniform growth of titanium dioxide nanotubes. Post-anodization, the samples were immersed sequentially in ethylene glycol, a 1:1 mixture of ethylene glycol and acetone, and pure acetone, each for 30 minutes, followed by rinsing and drying. Finally, the samples were annealed in a muffle furnace at 450°C for 1 hour, with a 1 hour ramp-up time, and then cooled naturally.

### **Deposition of CdS films on Ti/TiO<sub>2</sub>**

An electrolyte solution containing 0.2 M Cd(CH<sub>3</sub>COO)<sub>2</sub>·2H<sub>2</sub>O and 0.2 M Na<sub>2</sub>S<sub>2</sub>O<sub>3</sub> was used, after its pH was adjusted to about 2.7 with concentrated H<sub>2</sub>SO<sub>4</sub>. The electrodeposition process was carried out at a three-electrode configuration with the Si electrode as the working electrode (WE), saturated Ag/AgCl electrode (3 M KCl) as the reference electrode (RE), and carbon rod as the counter electrode (CE). A constant current electrodeposition was carried out at 1.4 V under 75 °C for 20 minutes. Then, the obtained electrode was taken out and washed by deionized water and ethanol successively.

### **Fabrication of Ti/TiO<sub>2</sub>/CdS/ZnSe photoanode**

Hydrothermal route was utilized for the preparation of ZnSe nanoparticles. 0.05 M selenium powder, 0.1 M zinc nitrate and 4.0 M KOH were mixed to form a mixture solution. After thoroughly stirring until evenly mixed, a reducing agent of 1.3 M HONH<sub>3</sub>Cl was slowly dripped, which is conducive to the formation of ZnSe nanoparticles. Before adding the mixed solution, place the titanium sheet with the CdS

thin film into the autoclave. Finally, carry out heat treatment at 180°C for 3 hours. Once mixture has been cooled to ambient temperature, it was extracted from the autoclave and subjected to three consecutive washes with water and ethanol, as Photoanode Ti/TiO<sub>2</sub>/CdS/ZnSe.

## Supplementary Note S3:

### Photoelectrochemical measurements

A three-electrode measurement configuration was employed using Si-based photocathodes as the working electrode, Pt as the counter electrode, and Hg/HgO as the reference electrode. A potentiostat (CHI 660) was used to apply potential to the working electrode. The electrolyte was prepared by dissolving 1 M KOH in DI water. The photoelectrochemical performance was measured under chopped illumination from a 300 W Xe lamp equipped with AM 1.5 G. The calibration of the light intensity to 1 sun was conducted with a photometer. Before the measurements, nitrogen gas ( $\geq 99.999\%$ ) was injected into the electrolyte for at least 30 min to remove the dissolved oxygen. All the potential values can be calibrated against the reversible hydrogen electrode (RHE) using the following equation:

$$E_{\text{RHE}} = E_{\text{Hg/HgO}} + 0.097 \text{ V} + 0.059 \text{ V} \times \text{pH} \quad (\text{S1})$$

Linear sweep voltammetry was conducted at a scan rate of  $10 \text{ mV s}^{-1}$  and bias was applied from  $-0.2$  to  $0.6 \text{ V}_{\text{RHE}}$ . For the stability test, the current density was measured using chronoamperometry at a bias of  $0 \text{ V}_{\text{RHE}}$  under continuous illumination.

Photoelectrochemical impedance spectroscopy (PEIS) was carried out at a potential from  $0.2$  to  $-0.2 \text{ V}_{\text{RHE}}$  and the AC potential frequency ranged from  $10^5$  to  $0.01 \text{ Hz}$  under illumination.

Chronoamperometry measurements were carried out at a potential of  $0 \text{ V}_{\text{RHE}}$  in  $1 \text{ M}$  KOH under the simulated AM 1.5G illumination.

**The gas products** were analyzed by gas chromatography (GC-2060, Ruimin) equipped with a thermal conductivity detector (TCD) for quantifying H<sub>2</sub>.

**ABPE** was calculated through the equation:

$$\text{ABPE} = \frac{j \times (0 - V)}{P_{\text{in}}} \times 100\% \quad (\text{S2})$$

where  $j$  is the actual current density (mA/cm<sup>2</sup>),  $V$  is the applied bias voltage ( $V_{\text{RHE}}$ ), and  $P_{\text{in}}$  is the optical power density (mW/cm<sup>2</sup>).

### Two-electrode System

For the PEC tandem device for on **Ti/TiO<sub>2</sub>/CdS/ZnSe** photoanode coupled with hydrogen production on **Si/PTH/CdS/CoP** photocathode, its photoelectrochemical tests were carried out in a square quartz electrolytic cell. A 0.25 M Na<sub>2</sub>S+0.35 M Na<sub>2</sub>SO<sub>3</sub> solution (pH 13.220) for anode electrolyte with a 1.0 M KOH solution (pH 14) for cathode electrolyte was used for the bias-free PEC measurements.

STH in the two-electrode system was calculated through the equation:

$$\eta_{\text{STH}} = \frac{r_{\text{H}_2} \times \Delta G_{\text{H}_2}}{P_{\text{in}} \times A} \quad (\text{S3})$$

$r_{\text{H}_2}$  (Hydrogen production rate): mol/s

$\Delta G_{\text{H}_2}$ : (The heat of combustion of hydrogen) : 285.8 kJ/mol.

$P_{\text{in}}$  (Incident light power density) : 100 mW/cm<sup>2</sup> (AM 1.5G).

$A$  (illumination area): cm<sup>2</sup>

## Butler-Volmer theory's plots

This equation describes the behavior of the photocurrent on the carrier density, diffusion length ( $L_p$ ), applied potential ( $V$ ), flat-band potential ( $V_B$ ), the “width constant” of SCR ( $W_0$ ), and wavelength of incident light ( $\varphi_0$ ).

$$j = q\varphi_0 \left( 1 - \frac{\exp(-\alpha W_0 (V - V_B)^{1/2})}{1 + \alpha L_p} \right) \quad (\text{S4})$$

A much simpler method for obtaining flat-band potentials is possible for  $\alpha L_p \ll 1$ . We can expand the above exponential for  $\alpha W_0 (V - V_B)^{1/2} \ll 1$ . Then, the relation between applied potential and photocurrent density becomes

$$(V - V_B) \propto (j / \alpha W_0 q \varphi_0)^2 \quad (\text{S5})$$

in which  $\alpha$  is the optical absorption coefficient,  $W_0$  is the depletion width, and  $\varphi_0$  is the light intensity.

The Gartner-Butler model assumes an ideal behavior, where  $V_0$  is the flat-band potential, but the real onset potential for water reduction is more negative than the flat-band potential.

## Supplementary Note S4:

### The Charge Separation and Injection Efficiency

In principle, the photocurrent of HER ( $J_{\text{photocurrent}}$ ) is a product of the rate of photon absorption expressed as a current density ( $J_{\text{absorbed}}$ ), the charge separation yield of the photogenerated carriers ( $P_{\text{charge separation}}$ ), and charge injection yield to the electrolyte ( $P_{\text{charge injection}}$ ):

$$J_{\text{photocurrent}} = J_{\text{absorbed}} * P_{\text{charge separation}} * P_{\text{charge injection}} \quad (\text{S6})$$

The photocurrent measured in the electrolyte with  $\text{K}_3[\text{Fe}(\text{CN})_6]$  ( $J^{\text{K}_3[\text{Fe}(\text{CN})_6]}_{\text{photocurrent}}$ ) is only a product of  $J_{\text{absorbed}}$  and  $P_{\text{charge separation}}$ , assuming the charge injection yield becomes 100% ( $P_{\text{charge injection}} = 1$ ) in the presence of an electron scavenger  $\text{K}_3[\text{Fe}(\text{CN})_6]$  in the electrolyte:

$$J^{\text{K}_3[\text{Fe}(\text{CN})_6]}_{\text{photocurrent}} = J_{\text{absorbed}} * P_{\text{charge separation}} \quad (\text{S7})$$

Based on the above equations, the charge injection yield can be achieved:

$$P_{\text{charge injection}} = J_{\text{photocurrent}} / J^{\text{K}_3[\text{Fe}(\text{CN})_6]}_{\text{photocurrent}} \quad (\text{S8})$$

The charge separation yield is given by:

$$P_{\text{charge separation}} = J^{\text{K}_3[\text{Fe}(\text{CN})_6]}_{\text{photocurrent}} / J_{\text{absorbed}} \quad (\text{S9})$$

## Supplementary Note S5: DOS Equation

the space charge capacitance ( $C_{SC}$ ), to ( $D$ ), the DOS variable, as a surface potential is applied ( $\phi_s$ ) to modulate the Fermi level ( $E_F$ ) of the electrode. This relationship includes the permittivity of free space ( $\epsilon_0$ ), the permittivity of the material ( $\epsilon$ ), and the charge of an electron ( $e$ ).

$$D(E_f + \phi_s) = \frac{1}{\epsilon\epsilon_0 e} C_{sc}(\phi_s)^2 \quad (S10)$$

| Variable          | Value                   | Units                              |
|-------------------|-------------------------|------------------------------------|
| $\epsilon$        | 11.8                    | Unitless                           |
| $\epsilon_0$      | $8.854 \times 10^{-14}$ | $\frac{C \text{ cm}}{\text{cm}^2}$ |
| $e$               | $1.602 \times 10^{-19}$ | C                                  |
| $C_{sc}(\phi_s)$  | <i>Measured*</i>        | $\frac{C}{\text{cm}^2}$            |
| $D(E_F + \phi_s)$ | Calculated              | $V^{-1} \text{cm}^{-3}$            |

\*Note: The capacitance measured needs to be corrected manually for the experimental cell area before using it in the calculation of DOS so the units become  $F/\text{cm}^2$ . For our experiment, this value is  $0.36 \text{ cm}^2$ .

The space charge capacitance ( $C_{SC}$ ) was collected in contact with 0.1 M TBAPF<sub>6</sub> in MeCN with an Ag/Ag<sup>+</sup> reference and platinum mesh counter electrode. Then, the

capacitance data was converted to DOS units according to eq S10.

## Supplementary Note S5:

The Mott-Schottky measurements performed in MeCN contained 0.1 M TBAPF<sub>6</sub> with a sinusoidal modulation of 10 mV at a frequency of 400 Hz. The reference electrode and counter electrode is Pt wire and Pt sheet, respectively.

The reverse-bias dependence of the area-normalized differential capacitance in the depletion region of the semiconductor is given by the Mott-Schottky relation:

$$\frac{1}{C^2} = \frac{2}{A^2 \epsilon_0 \epsilon_r q N_A} \left( V_{\text{app}} - V_{\text{fb}} - \frac{k_B T}{q} \right) \quad (\text{S11})$$

where  $A$  is the device area,  $\epsilon_0$  is the vacuum permittivity ( $8.85 \times 10^{-14}$  F cm<sup>-1</sup>),  $\epsilon_r$  is the relative permittivity (11.68 F cm<sup>-1</sup>),  $q$  is the unsigned charge on an electron ( $1.6 \times 10^{-19}$  C),  $N_A$  is the acceptor impurity concentration in the semiconductor,  $V_{\text{app}}$  is the difference between the applied potential and the redox potential of the solution,  $V_{\text{fb}}$  is the flat-band potential,  $K$  is Boltzmann's constant, and  $T$  is the temperature 298 K.

## Supplementary Note S6:

### OCP-derived carrier lifetimes

The decay curves of the open circuit potential (OCP) of the *p*-Si photoanodes with different layered structures provide not only information about the built-in electrical field but also the lifetime of the photogenerated charge carriers.

The carrier lifetime was quantified by :

$$\tau_n = -\frac{k_B T}{e} \left( \frac{dOCP}{dt} \right)^{-1} \quad (S12)$$

where  $\tau_n$ ,  $k_B$ ,  $T$ ,  $e$ , and  $dOCP/dt$  are the carrier lifetime, Boltzmann's constant, temperature (K), charge of single electron and derivative of the OCP transient decay, respectively.

Under steady-state illumination, a larger band bending (as achieved in the Si/PTH/CdS/Co-P photocathode) provides a stronger driving force for charge separation, effectively suppressing recombination and allowing more carriers to reach the surface for HER. This is why the device exhibits superior PEC performance.

When the light is turned off, the system returns from the illuminated quasi-equilibrium (with flattened bands) to the dark equilibrium (with fully bent bands). In a device with larger band bending, the depletion region contains more stored spatial charge. The recombination of this stored charge upon light cessation is therefore more rapid, resulting in a shorter OCP decay time (25  $\mu$ s for Si/PTH/CdS/Co-P, compared to 3 ms and 4 s for the control samples).

## Supplementary Note S7:

### Normalized parameter

A normalized parameter (D) is involved by the transient photocurrent result:

$$D = \frac{I_t - I_{st}}{I_{in} - I_{st}} \quad (S13)$$

where  $I_t$ ,  $I_{st}$ , and  $I_{in}$  are the time-dependent, steady-state and initial photocurrents, respectively.

## Supplementary Note S8:

Raman spectroscopy was performed on the **Si/PTH/CdS/Co-P** photocathode before and after the stability test (Fig. 5e). Before the reaction, the spectrum exhibits characteristic peaks of the Si substrate at  $520\text{ cm}^{-1}$  (transverse optical mode, TO) and  $581.2/671.1\text{ cm}^{-1}$  (longitudinal acoustic mode, LA) ([Physica B: Condensed Matter, 2023, 669, 415302](#)), along with a strong second-order Raman band at  $\sim 970\text{ cm}^{-1}$  ([Physical Review B, 1973, 7, 3685](#)). Additional peaks at  $420$  and  $434\text{ cm}^{-1}$  are attributed to Co-P ([Chemical science, 2018, 9, 5322-5333](#)), while those at  $91$  and  $301\text{ cm}^{-1}$  originate from CdS ([Macromolecular Symposia. 2023, 407, 2100441](#)).

After 10 hours of operation, the Co-P-related peaks shift to  $472.7$  and  $519.7\text{ cm}^{-1}$ , indicating a structural rearrangement of the Co-P phase. Notably, the signals from the Si substrate and CdS are no longer detectable. This attenuation is consistent with the morphological evolution observed by SEM (**Fig. 5f-g**): the fresh nanoflower-like Co-P structure transforms into a more continuous hexagonal prism overlayer after the reaction, which effectively shields the substrate signals. The increased intensity of the Co-P Raman response may also reflect structural rearrangement or surface enhancement effects.

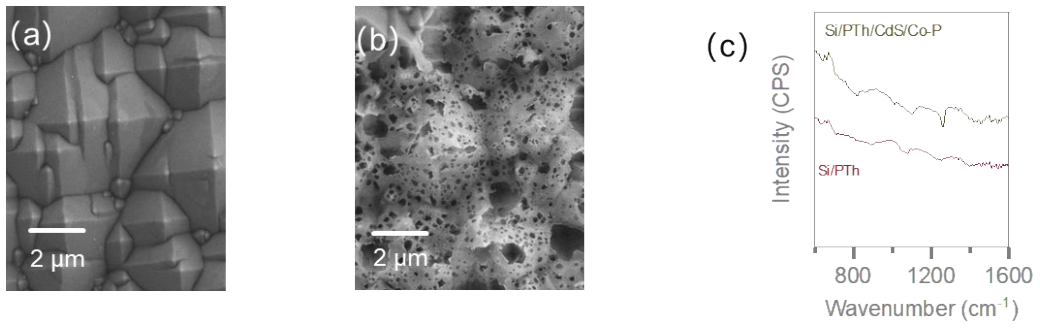

**Supplementary Figure S1** || SEM image on the surface of *p*-Si after wet chemical etching (a) and after (b) the PTH polymer. (c)

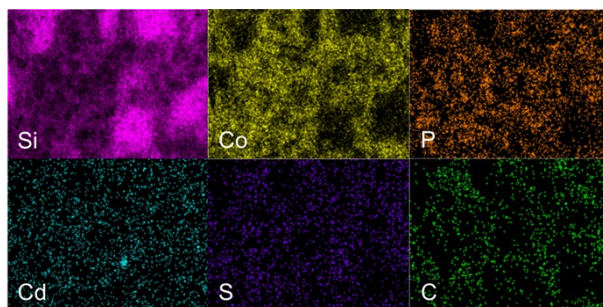

**Supplementary Figure S2** || The EDS images for these elements for the

**Si/PTH/CdS/Co-P** photocathode

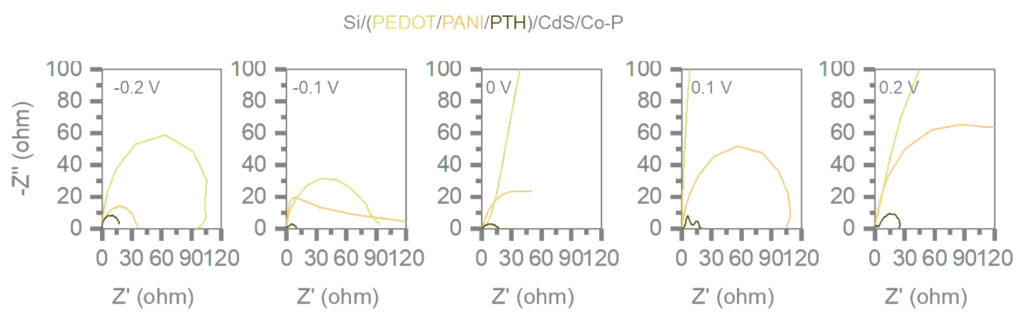

**Supplementary Figure S3** || Nyquist plots ranged from -0.2 to 0.2 V<sub>RHE</sub>

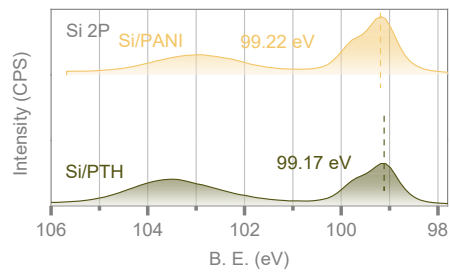

**Supplementary Figure S4** || High-resolution XPS for Si 2P on Si/PANI and Si/PTH electrode.

The Si 2p XPS spectra reveal that the Si<sup>0</sup> peak, located at 99.4 eV for bare Si, shifts to lower binding energy by approximately 0.23 eV for Si/PTH and 0.18 eV for Si/PANI after polymer deposition. The interaction is therefore primarily electrostatic in nature, leading to the formation of an interfacial dipole layer.

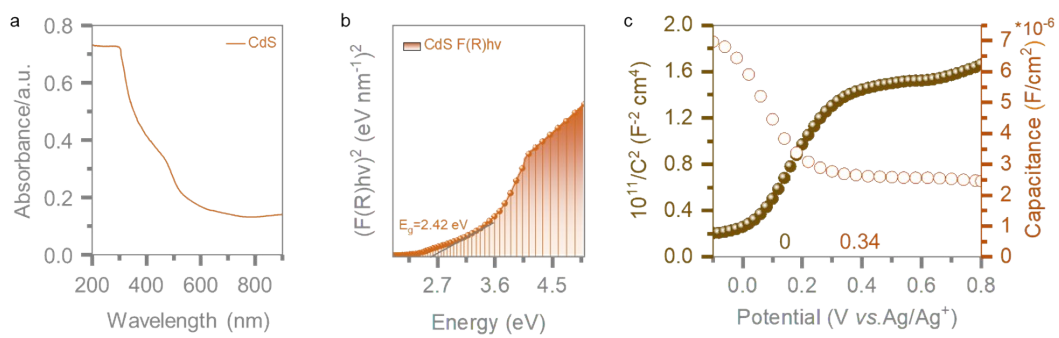

**Supplementary Figure S5** || Absorption spectrum (a), Tauc plot (b) and M-S plots (c) for CdS film

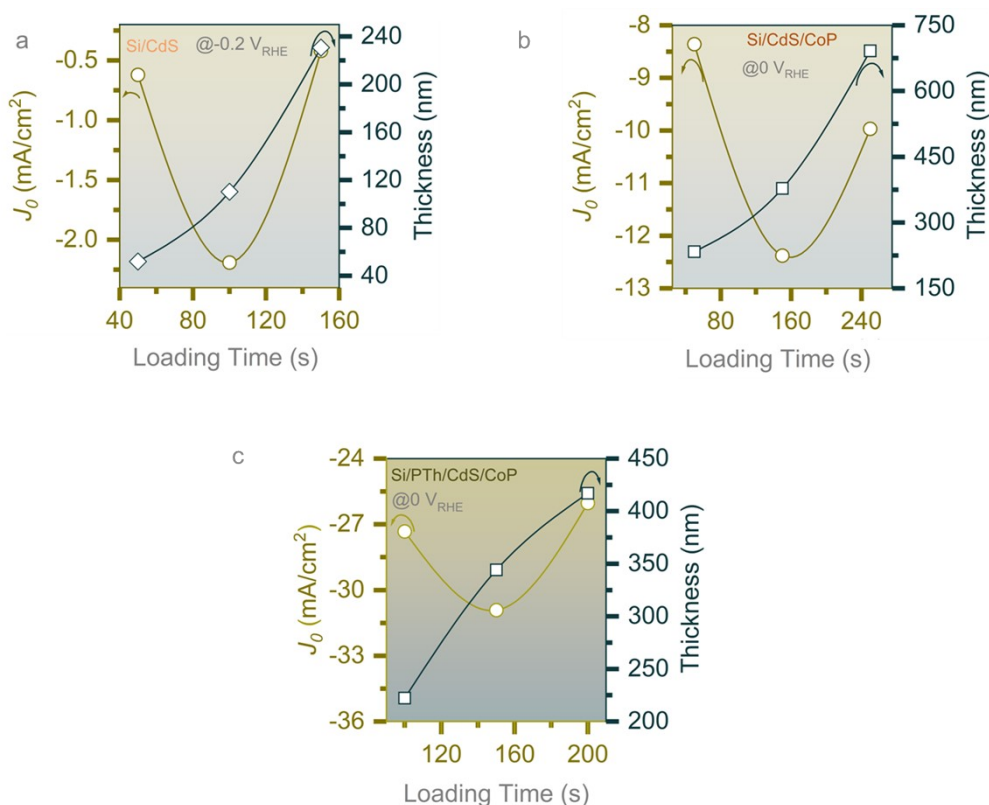

**Supplementary Figure S6** || The thickness impact of CdS films (a), Co-P (b) and PTH films (c) on current density

As shown in **Figure S6**, the thickness of the as-prepared CdS, Co-P and PTH layer can be adjusted deposition time.

For the CdS layers, the photocurrent density at  $-0.2 V_{RHE}$  increases with the deposition time from 50 s to 100 s, and then decreases when deposition time extending to 150 s. Therefore, the CdS selects the 100 s deposition time of the optimal condition to subsequent preparation conditions (**Figure S6a**).

Compared their PEC performances on Co-P cocatalyst in **Figure S6b**. It is seen that the photocurrent density at  $0 V_{RHE}$  increases with the deposition durations from 50 s to 150 s, and then decreases when the deposition time further extending to 250 s. Obviously, the

Co-P cocatalyst selected the deposition duration of 150 s presents the optimal PEC activity in the present work.

In **Figure. S6c**, the photocurrent density at 0 V<sub>RHE</sub> increases with PTH deposition durations from 100 s to 150 s, and then decreases when deposition time extending to 200 s. Obviously, the 150 s deposition duration of PTH exhibits the optimal PEC activity in the present work.

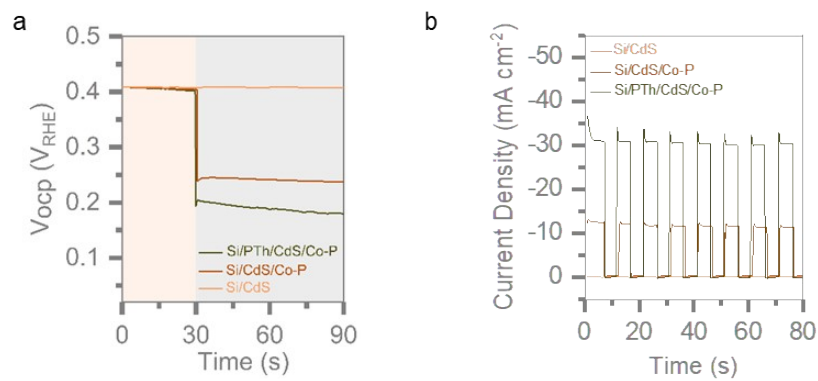

**Supplementary Figure S7** || (a) Open-circuit potential transient decay. (b) The chopped current density over the three photocathodes at 0  $V_{RHE}$  under one-sun condition.

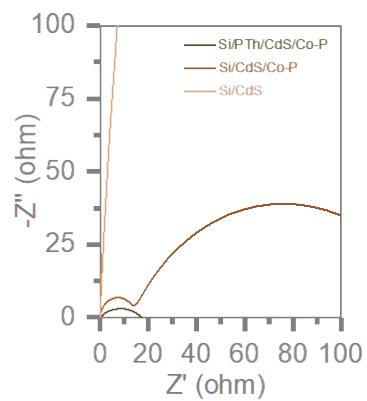

**Supplementary Figure S8** || The Nyquist plots for the three photocathodes

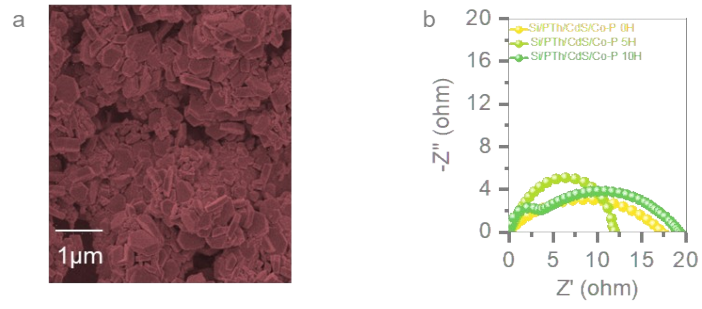

**Supplementary Figure S9** || (a) The SEM image for the **Si/PTH/CdS/Co-P** photocathode after 5 min of the stability test. (b) **The Nyquist plots for the Si/PTH/CdS/Co-P** photocathode after 0 h, 5 h, and 10 h of reaction.

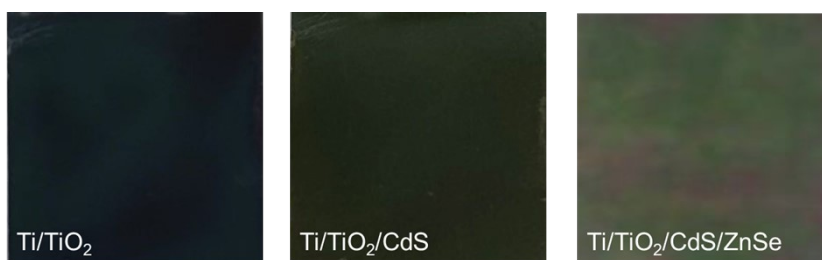

**Supplementary Figure S10** || The images for the photoanode

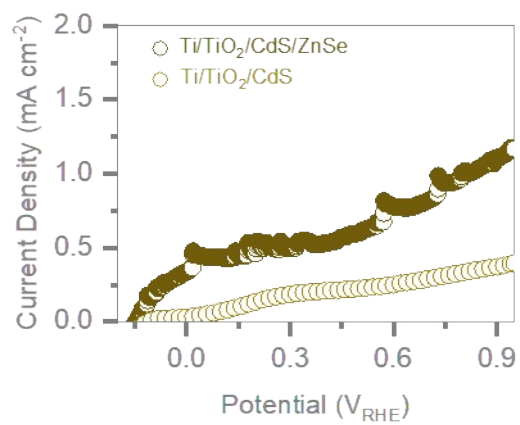

**Supplementary Figure S11** || The PEC performance on these photoanodes in 0.25 M Na<sub>2</sub>S+0.35 M Na<sub>2</sub>SO<sub>3</sub> (pH=13.22) anolyte solution

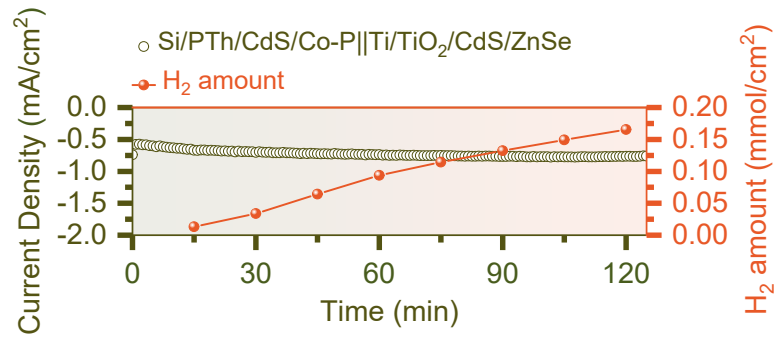

**Supplementary Figure S12** || The H<sub>2</sub> evolution for the two-electrode system

According to the eq S3, the STH of the two-electrode system was calculated to be 0.02%.

**Supplementary Table S1** || The change in OCP between the dark and illuminated conditions

|               | <b>Si/CdS</b> | <b>Si/CdS/Co-P</b> | <b>Si/PTh/CdS/Co-P</b> |
|---------------|---------------|--------------------|------------------------|
| $V_{ph}$ (mV) | 1             | 172                | 220                    |
| $OCP_{light}$ | 427           | 422                | 414                    |
| $OCP_{dark}$  | 426           | 252                | 193                    |

In the absence of illumination, the equilibrium between the photoelectrode and the electrolyte dictates that the measured open-circuit potential reports on the position of the Fermi level. Under illumination, the equilibrium between the electrolyte and the photoelectrode is maintained by the quasi-Fermi level of electrons; the Fermi level holes move in the positive direction. The difference between the newly measured potential (quasi-equilibrium) and that in dark (equilibrium) reports on the photovoltage.

Under illumination, the quasi-equilibrium potentials measured on these photocathodes should be comparable because this value is determined by the nature of the material. The key difference between the measured open-circuit potentials would be seen in the dark condition.

**Supplementary Table 2.** || The state-of-art performance over Si-based photocathodes in PEC-HER application.

| Photocathodes                                      | Onset                   |                                        | $J_{sc}$ @ 0 $V_{RHE}$ | Ref |
|----------------------------------------------------|-------------------------|----------------------------------------|------------------------|-----|
|                                                    | Potential ( $V_{RHE}$ ) | Electrolyte                            |                        |     |
| p-Si/n-CdS                                         | 0.1                     | (Tri-HCl) buffer solution (pH = 6.8)   | -1.45                  | S1  |
| Si/CdS/TiO <sub>2</sub> /Pt                        | 0.42                    | 1 M Phosphate buffer solution (pH 6.8) | -21.9                  | S2  |
| p-Si/AZO/TiO <sub>2</sub> /CoP <sub>2</sub>        | 0.48                    | 0.5 M H <sub>2</sub> SO <sub>4</sub>   | -16.7                  | S3  |
| Co-P/20WS <sub>x</sub> /Si                         | 0.47                    | 1.0M KOH                               | -25.1                  | S4  |
| Si/Co–NCNHP–TiO <sub>2</sub> /CoP                  | 0.18                    | 0.5 M Na <sub>2</sub> SO <sub>4</sub>  | -23.04                 | S5  |
| Si/C <sub>N</sub> /TiO <sub>2</sub> (ALD/PP)/NiCoP | 0.42                    | 1.0M KOH                               | -19.87                 | S4  |
| p-Si/PEIE/TiO <sub>2</sub> /Pt                     | 0.48                    | H <sub>2</sub> SO <sub>4</sub> (pH 1)  | -25.5                  | S7  |
| Si@FeOOH/Ag/Cu <sub>2</sub> O@Cu-CN                | 0.61                    | 0.1 M KOH                              | -11.45                 | S8  |

|                                                                   |       |                                      |        |            |
|-------------------------------------------------------------------|-------|--------------------------------------|--------|------------|
| <b>Si/PANI/Cu<sub>2</sub>O/SnS<sub>x</sub></b>                    | 0.45  | 1 M KOH                              | -21.64 | <b>S9</b>  |
| <b>a-Si/Fh/Ni</b>                                                 | 0.57  | 1 M KOH                              | -15.6  | <b>S10</b> |
| <b>n+p-SiIP-T<sub>4</sub>/TiO<sub>2</sub></b>                     | 0.11  | 0.1 M KOH                            | -2.4   | <b>S11</b> |
| <b>Si/MoS<sub>2</sub></b>                                         | 0.16  | 0.5 M H <sub>2</sub> SO <sub>4</sub> | -0.16  | <b>S12</b> |
| <b>NNH/Si</b>                                                     | 0.28  | 0.5 M H <sub>2</sub> SO <sub>4</sub> | -18.9  | <b>S13</b> |
| <b>MoS<sub>2</sub>/SnS<sub>2</sub>/Si</b>                         | 0.23  | 0.5 M H <sub>2</sub> SO <sub>4</sub> | -23.8  | <b>S14</b> |
| <b>pn<sup>+</sup>-Si/5nmTiO<sub>2</sub>/WO<sub>x</sub>-<br/>C</b> | 0.086 | 1 M KOH                              | -4.3   | <b>S15</b> |
| <b>SR Ni<sub>0.95</sub>Pt<sub>0.05</sub>Si</b>                    | -0.05 | 0.5 M H <sub>2</sub> SO <sub>4</sub> | 0      | <b>S16</b> |
| <b>p-Si/ WS<sub>2</sub>/MoS<sub>2</sub></b>                       | 0.17  | 0.5 M H <sub>2</sub> SO <sub>4</sub> | -25    | <b>S17</b> |
| <b>MoS<sub>2</sub> NPs/TiO<sub>2</sub><br/>NRs/p-Si</b>           | 0.18  | 1 M KOH                              | -10    | <b>S18</b> |
| <b>This Work</b>                                                  | 0.31  | 1 M KOH                              | -30.08 |            |

## Reference

S1. Wu, S.; Li, L.; Qin, L.; Zhou, Z., Construction of p-Si/n-CdS Core/shell Nanowire Heterojunction for Photoelectrochemical Water Splitting. *International Journal of Hydrogen Energy* 2024, 73, 118-125.

S2. Liu, S.; Luo, Z.; Li, L.; Li, H.; Chen, M.; Wang, T.; Gong, J., Multifunctional TiO<sub>2</sub> Overlayer for p-Si/n-CdS Heterojunction Photocathode with Improved Efficiency and Stability. *Nano Energy* 2018, 53, 125-129.

S3. Li, H.; Wen, P.; Itanze, D. S.; Kim, M. W.; Adhikari, S.; Lu, C.; Jiang, L.; Qiu, Y.; Geyer, S. M., Retracted: Phosphorus-Rich Colloidal Cobalt Diphosphide (CoP<sub>2</sub>) Nanocrystals for Electrochemical and Photoelectrochemical Hydrogen Evolution. *Advanced Materials* 2019, 31, 1900813.

S4. Li, S.; Lin, H.; Yang, G.; Ren, X.; Luo, S.; Wang, X.-s.; Chang, Z.; Ye, J., A Synergetic Strategy to Construct Anti-Reflective and Anti-Corrosive Co-P/WS<sub>x</sub>/Si Photocathode for Durable Hydrogen Evolution in Alkaline Condition. *Applied Catalysis B: Environmental* 2022, 304, 120954.

S5. Li, X.; Zhao, H.; Huang, J.; Li, Y.; Miao, H.; Shi, G.; Wong, P. K., A High-performance TiO<sub>2</sub> Protective Layer Derived from Non-high Vacuum Technology for a Si-based Photocathode to Enhance Photoelectrochemical Water Splitting. *Journal of Materials Chemistry A*. 2024, 12, 16605-16616.

S6. Sun, X.; Liu, C.; Zhang, P.; Gong, L.; Wang, M., Interface-engineered Silicon Photocathodes with a NiCoP Catalyst-modified TiO<sub>2</sub> Nanorod Array Outlayer for Photoelectrochemical Hydrogen Production in Alkaline Solution. *Journal of Power Sources*

2021, 484, 229272.

S7. Yun, J.; Tan, J.; Jung, Y.-K.; Yang, W.; Lee, H.; Ma, S.; Park, Y. S.; Lee, C. U.; Niu, W.; Lee, J.; Kim, K.; Tilley, S. D.; Walsh, A.; Moon, J., Interfacial Dipole Layer Enables High-Performance Heterojunctions for Photoelectrochemical Water Splitting. *ACS Energy Letters* 2022, 7, 1392-1402.

S8. Jia, Y.; Cheng, Y.; Zhang, Y.; Ma, J., A p-n-p Configuration Based on the Cuprous Oxide/Silicon Tandem Photocathode for Accelerating Solar-Driven Hydrogen Evolution. *ACS Applied Materials & Interfaces* 2024, 16, 25551-25558.

S9. Ji, L.; Cheng, Y.; Qiang, Y.; Fu, X.; Jia, Y., Boosting the Performance of Cu<sub>2</sub>O/p-Si Hybrid Photocathodes for Solar-Driven H<sub>2</sub> Generation: from Charge Dynamics to Thermodynamic Factors. *ACS Applied Materials & Interfaces* 2025, 17, 22519-22528.

S10. Zhang, D.; Du, M.; Wang, P.; Wang, H.; Shi, W.; Gao, Y.; Karuturi, S.; Catchpole, K.; Zhang, J.; Fan, F.; Shi, J.; Liu, S., Hole-Storage Enhanced a-Si Photocathodes for Efficient Hydrogen Production. *Angewandte Chemie International Edition* 2021, 60, 11966-11972.

S11. Lu, J.-H.; Li, Z.; Zhang, D.; Song, L.-H.; Cai, X.-Y.; Mao, L.; Liu, Z.-Q.; Wang, Z.-J.; Gu, X.-Q.; Yuan, G.-D., Enhanced solar hydrogen evolution by laminated integration of n+p-SiIP/TiO<sub>2</sub>/Pt inverted pyramid black Si photocathode. *Journal of Alloys and Compounds* 2024, 1009, 176796.

S12. Yu, J.; Wang, Y.; Gai, Q.; Hou, C.; Luan, Z.; Liang, Y.; Liu, W.; Fan, X., Enhanced utilization of light through polystyrene microspheres for boosting photoelectrochemical hydrogen production in MoS<sub>2</sub>/Si heterostructures. *Journal of Materials Chemistry A* 2025,

13, 8134-8143.

S13. Li, S.; Yang, G.; Ge, P.; Lin, H.; Wang, Q.; Ren, X.; Luo, S.; Philo, D.; Chang, K.; Ye, J., Engineering Heterogeneous NiS<sub>2</sub>/NiS Cocatalysts with Progressive Electron Transfer from Planar *p*-Si Photocathodes for Solar Hydrogen Evolution. *Small Methods* 2021, 5, 2001018.

S14. Jena, A.; Pichaimuthu, K.; Leniec, G.; Kaczmarek, S. M.; Chang, H.; Su, C.; Hu, S.-F.; Liu, R.-S., Defect Mediated Improvements in the Photoelectrochemical Activity of MoS<sub>2</sub>/SnS<sub>2</sub> Ultrathin Sheets on Si Photocathode for Hydrogen Evolution. *ACS Applied Materials & Interfaces* 2022, 14, 39896-39906.

S15. Liu, B.; Yang, J.; Li, F.; Liu, J.; Zhao, L.; Sun, L.; Chen, H.; Zhang, P.; Gao, L., WO<sub>x</sub>-Carbon Nanorods Catalyzed Photoelectrochemical Hydrogen Evolution Reaction of Silicon-photocathode in Acidic Media. *Chemical Engineering Journal* 2024, 497, 154402.

S16. Zhang, H.; Li, S.; Xu, J.; Sun, X.; Xia, J.; She, G.; Yu, J.; Ru, C.; Luo, J.; Meng, X.; Mu, L.; Shi, W., Dissolution-Induced Surface Reconstruction of Ni<sub>0.95</sub>Pt<sub>0.05</sub>Si/*p*-Si Photocathode for Efficient Photoelectrochemical H<sub>2</sub> Production. *Small* 2024, 20, 2311738.

S17. Lee, J. Y.; Jun, S. E.; Shim, J. H.; Kang, H. S.; Kim, C.; Kim, K.; An, J. Y.; Choi, S.; Yun, J.; Kang, J.; Lee, S. W.; Park, S.; Lee, H.; Yi, Y.; Jang, H. W.; Lee, C. H., Wafer-Scale Semitransparent MoS<sub>2</sub>/WS<sub>2</sub> Heterojunction Catalyst on a Silicon Photocathode for Efficient Hydrogen Evolution. *Small* 2024, 21, 2407650.

S18. Jun, S. E.; Hong, S. P.; Choi, S.; Kim, C.; Ji, S. G.; Park, I. J.; Lee, S. A.; Yang, J. W.; Lee, T. H.; Sohn, W.; Kim, J. Y.; Jang, H. W., Boosting Unassisted Alkaline Solar Water Splitting Using Silicon Photocathode with TiO<sub>2</sub> Nanorods Decorated by Edge-Rich MoS<sub>2</sub>

Nanoplates. Small 2021, 17, 2103457.
